# Supplementary material for: Fabrication of 3D supramolecular hybrid particle microstructures with controllable morphology and dimensions
Source: Royal Society of Chemistry journal article supplement (doi:10.1039/b909918b), 2009-01-01
Supplement: b909918b.pdf [file b909918b.pdf]

## Electronic Supplementary Information

# Fabrication of 3D supramolecular hybrid particle microstructures with controllable morphology and dimensions

*Xing Yi Ling,<sup>#</sup> Jurriaan Huskens\**

Molecular Nanofabrication Group, MESA+ Institute for Nanotechnology, University of Twente, P.O.

Box 217, 7500 AE, Enschede, The Netherlands.

<sup>#</sup> Current address: Department of Chemistry, University of California, Berkeley, California, 94720.

[J.Huskens@utwente.nl](mailto:J.Huskens@utwente.nl)

## Experimental Section

**Materials.** Adamantyl-terminated poly(propylene imine) dendrimer of generation 5 (G5-PPI-(Ad)<sub>64</sub>) was synthesized as described before.<sup>27</sup> Lissamine rhodamine B sulfonylchloride, fluorescein, 2-naphthoic acid were obtained from Sigma Aldrich, Germany. Carboxylate-functionalized polystyrene particles of 500 nm were purchased from Polysciences Inc. Gold nanoparticles (Au-CD,  $d \sim 3$  nm) and CD-functionalized polystyrene particles (PS-CD), prepared from the carboxylate-functionalized particles, were prepared as described before.<sup>14,28</sup> Milli-Q water with a resistivity higher than 18 M $\Omega$ cm was used in all experiments.

**Substrate and monolayer preparation.** Flat silicon substrates were cleaned by immersion in piranha solution (conc.  $\text{H}_2\text{SO}_4$  and 33%  $\text{H}_2\text{O}_2$  in a 3:1 volume ratio, **Warning!** piranha should be handled with caution; it is a highly corrosive oxidizing agent) for 15 min to form a  $\text{SiO}_2$  layer on the surface. The substrates were then sonicated in Milli-Q water and ethanol for 1 min, and dried with  $\text{N}_2$ .

Nanoimprint lithography (NIL) was performed by putting a hard silicon master (e.g. 10  $\mu\text{m}$  hexagons at 3  $\mu\text{m}$  spacing with a height of 500 nm) in contact with a 800 nm thick layer of PMMA on a  $\text{SiO}_2$  substrate.<sup>9</sup> A pressure of 40 bar was applied at a temperature of 180 °C using a hydraulic press (Specac). Oxygen plasma etching (Tepla 300E) was applied for 30 s to remove the residual polymer layer also rendering the resulting polymer pattern hydrophilic.

**Formation of hybrid structures.** The hybrid structures were prepared by layer-by-layer (LbL) assembly of Au-CD nanoparticles ( $d \sim 3$  nm) and G5-PPI-(Ad)<sub>64</sub> on the NIL-patterned substrate, according to a published procedure.<sup>14</sup> The positively charged Ad dendrimers were first adsorbed onto the slightly negatively charged PMMA template. Complementary Au-CD nanoparticles were subsequently adsorbed. Up to 30 LbL cycles were performed. After each adsorption step, the substrate was blown dry with  $\text{N}_2$ .

**Encapsulation of fluorescent molecules within the hybrid structures.** Infiltration of fluorescent molecules into the hybrid structures was performed prior to the release process. The hybrid structures on the NIL-patterned substrate were immersed in an aqueous solution of 1 mM lissamine-rhodamine, fluorescein or naphthoic acid for 10 min. The hybrid structures were subsequently rinsed gently with Milli-Q water and dried with  $\text{N}_2$ .

**Attachment of PS-CD nanoparticles on the hybrid structures.** Prior to the release process, the hybrid structures on the NIL-patterned substrate were immersed in 5 wt% of PS-CD nanoparticle aqueous solution, for 10 min. The hybrid structures were subsequently rinsed gently with Milli-Q water and dried with  $\text{N}_2$ .

**Lift-off of the hybrid structures.** Rinsing the hybrid structures in acetone for 2 s created cracks

at the edges between the PMMA patterns and the substrate, which facilitated the lift-off process thereafter. The hybrid structures on the patterned NIL substrate were sonicated in water in a vial in Branson® Ultrasonic Cleaner (Model 1510, frequency 40 Hz) for 10 – 30 min to lift off the hybrid objects from the surface. The substrate was removed from the vial after sonication. A few drops of a solution containing the hybrid objects were cast on a silicon surface for visualization.

**Scanning electron microscopy (SEM) and Atomic force microscopy (AFM).** All SEM images were taken with a HR-LEO 1550 FEF SEM. AFM measurements were carried out using a Dimension D3100 atomic force microscope.

**Fluorescence microscopy.** Fluorescence microscopy was performed using an Olympus inverted research microscope IX71 equipped with a mercury burner U-RFL-T as the light source and a digital camera Olympus DP70 (12.5 million-pixel cooled digital color camera) for image acquisition. Green excitation, red emission light ( $510 \leq \lambda_{\text{ex}} \leq 550$  nm,  $\lambda_{\text{em}} \geq 590$ ), blue excitation, and green emission light ( $450 \leq \lambda_{\text{ex}} \leq 480$  nm,  $\lambda_{\text{em}} \geq 515$  nm), and UV excitation ( $300 \leq \lambda_{\text{ex}} \leq 400$  nm,  $\lambda_{\text{em}} \geq 400$ ) were filtered using a U-MWG Olympus filter cube.
